# Supplementary material for: Investigation of population structure in Gulf of Mexico Seepiophila jonesi (Polychaeta, Siboglinidae) using cross-amplified microsatellite loci
Source: PeerJ. 2016 Aug 23;4:e2366. doi: 10.7717/peerj.2366 (PMC5012325; doi:10.7717/peerj.2366)
Supplement: Tables S3–S15 [file peerj-04-2366-s004.xlsx]

## Sheet: Table S3 EL454_2
Count of	BH	BH (Z) AT5	BH MC2	BH NC1	BH2	BH2 AT	BHV	BP	BP	GB543	GB544	GB647	GC234	MC751	VK826	Grand Total
Allele								(AT1)	(TW)
0								2						2		4
123			1						1		2	2		1		7
127	2				1			1		1	1			2	1	9
131								1		1				2	4	8
135								1			3		1			5
139	1								1	1			2		1	6
143	5	1		2		1	2		4	7	10	1	14	13	14	74
147	2	1						3	1	1	2			5	1	16
151			1			1		1	1	1	2		3		2	12
155					1			1		3			3	1	3	12
159													1	1	2	4
163														1		1
171														1		1
175												1				1
179										1						1
183												2		1		3
Grand Total	10	2	2	2	2	2	2	10	8	16	20	6	24	30	28	164

## Sheet: Table S4 EL454_5
Count of	BH	BH (Z) AT5	BH	BH NC1	BH2	BH2 AT	BH	BP	BP	GB543	GB544	GB647	GC234	MC751	VK826	Grand Total
Allele			MC2				V	(AT1)	(TW)
0													10	6	6	22
290														2		2
376										1					1	2
384							1	1		1						3
392	2							2			2			4		10
396														1	1	2
400	2	1	1	1	1	1	1	2	3	3	7		3	6	6	38
404	1								1	3	2		2	4	8	21
408	1		1		1								1			4
412	1									1			2		1	5
416				1					1	2	5	5	1	3	1	19
420											1				1	2
424	1	1				1		3	1	1		1	1	1	1	12
428								1			1			1		3
432	2							1	1	3	2		2	1		12
436														1		1
440									1				2		2	5
448										1						1
Grand Total	10	2	2	2	2	2	2	10	8	16	20	6	24	30	28	164

## Sheet: Table S5 EL454_6
Count of	BH	BH (Z) AT5	BH MC2	BH NC1	BH2	BH2 AT	BHV	BP	BP	GB543	GB544	GB647	GC234	MC751	VK826	Grand Total
Allele								(AT1)	(TW)
0												2	6	4		12
249	2		2	2	1	2	1	5	3	7	10		6	9	10	60
253	1							1								2
255	2	1			1			2		6	3	2	6	6	4	33
257	5	1					1	2	5	3	7	2	6	11	13	56
281															1	1
Grand Total	10	2	2	2	2	2	2	10	8	16	20	6	24	30	28	164

## Sheet: Table S6 EL454_54
Count of	BH	BH (Z) AT5	BH MC2	BH NC1	BH2	BH2 AT	BHV	BP	BP	GB543	GB544	GB647	GC234	MC751	VK826	Grand Total
Allele								(AT1)	(TW)
120	2		1	1		1		1	1	2	5		4	2	6	26
126	4	1				1	1	5	3	5	5	5	8	15	9	62
132	4	1	1	1	1		1	4	4	8	9	1	11	12	11	69
138					1					1	1		1		2	6
162														1		1
Grand Total	10	2	2	2	2	2	2	10	8	16	20	6	24	30	28	164

## Sheet: Table S7 EL454_60
Count of	BH	BH (Z) AT5	BH MC2	BH NC1	BH2	BH2 AT	BHV	BP	BP	GB543	GB544	GB647	GC234	MC751	VK826	Grand Total
Allele								(AT1)	(TW)
0											2		6	6	4	18
194												1		1		2
206	1								1	2	4		2	1	2	13
210	5	2	2	1	2	2	1	7	5	7	10	3	12	10	12	81
214	4			1			1	3	2	7	4	2	4	12	10	50
Grand Total	10	2	2	2	2	2	2	10	8	16	20	6	24	30	28	164

## Sheet: Table S8 ES454_4
Count of	BH	BH (Z) AT5	BH MC2	BH NC1	BH2	BH2 AT	BHV	BP	BP	GB543	GB544	GB647	GC234	MC751	VK826	Grand Total
Allele								(AT1)	(TW)
0	4							2			2	4	6	14	2	34
89											1					1
101		2		2		2		1	2		3	2	1	1		16
105	4		2				1	4	2	8	2		4	1	3	31
109	2				1		1	1	3	7	2		4	2	5	28
113					1				1	1			1	3	4	11
117											4			1	3	8
121											5		2		2	9
125											1		3	1	3	8
129								1					2	4	3	10
133								1					1	3	2	7
137															1	1
Grand Total	10	2	2	2	2	2	2	10	8	16	20	6	24	30	28	164

## Sheet: Table S9 ES454_13
Count of	BH	BH (Z) AT5	BH MC2	BH NC1	BH2	BH2 AT	BHV	BP	BP	GB543	GB544	GB647	GC234	MC751	VK826	Grand Total
Allele								(AT1)	(TW)
0											2		2	2		6
119				1							1			1	1	4
123									1	1	1		1	2	1	7
127	1							1		1	1		2	1		7
131	1						2		2	2	1	2	2	3	5	20
135			1											3	1	5
139		1						2	2	1	4	2	6	1	2	21
143	5	1	1	1	1	2		3	2	7	6	1	5	9	9	53
147	2				1			2	1	2	3		1	3	5	20
151	1							2		1	1	1	3	2	2	13
155													2	2	2	6
159														1		1
167										1						1
Grand Total	10	2	2	2	2	2	2	10	8	16	20	6	24	30	28	164

## Sheet: Table S10 ES454_18
Count of	BH	BH (Z) AT5	BH MC2	BH NC1	BH2	BH2 AT	BHV	BP	BP	GB543	GB544	GB647	GC234	MC751	VK826	Grand Total
Allele								(AT1)	(TW)
0										2						2
106	4			1						1	2		1		1	10
114	6	2	2	1	2	2	2	9	8	13	18	6	23	29	27	150
118								1								1
162														1		1
Grand Total	10	2	2	2	2	2	2	10	8	16	20	6	24	30	28	164

## Sheet: Table S11 ES454_22
Count of	BH	BH (Z) AT5	BH MC2	BH NC1	BH2	BH2 AT	BHV	BP	BP	GB543	GB544	GB647	GC234	MC751	VK826	Grand Total
Allele								(AT1)	(TW)
0										2	2		2	2		8
73													5	2		7
94	2						2	3	2	2	3	1	1	3		19
115	8	2	2	2	2	2		7	6	12	15	5	16	23	28	130
Grand Total	10	2	2	2	2	2	2	10	8	16	20	6	24	30	28	164

## Sheet: Table S12 ES454_31
Count of	BH	BH (Z) AT5	BH MC2	BH NC1	BH2	BH2 AT	BHV	BP	BP	GB543	GB544	GB647	GC234	MC751	VK826	Grand Total
Allele								(AT1)	(TW)
0											4		6	4	6	20
210								1								1
243												2				2
279									1							1
282												1				1
285	1		2					1		1	1		1			7
291	2										1			1		4
294	1	1					1		1	2	1		2		2	11
297								2		2	1				1	6
303	1								1	1		2	1		2	8
306					1			4		2	2		2	7	3	21
309					1	1					2			5	1	10
312								1		1			1	3	1	7
318	1						1		2		2		2	3		11
321		1						1	1	2	1		1	1	2	10
324											1				4	5
327										1			1	1	1	4
330	3			1					2	2	2		4	2	1	17
333						1				1			1	1	2	6
339										1		1		1		3
342	1										1					2
345				1							1		1	1		4
354															1	1
381															1	1
393													1			1
Grand Total	10	2	2	2	2	2	2	10	8	16	20	6	24	30	28	164

[truncated: 3 more sheets: Table S13 ES454_60, Table S14 ES454_71, Table S15 ES454_82]
